# Supplementary material for: Applicability of a Chemiluminescence Immunoassay to Screen Postmortem Bile Specimens and Its Agreement with Confirmation Analysis
Source: MDPI journal article supplement (doi:10.3390/ijms25073825), 2024-03-29
Supplement: s1 [file s1]

**Table S1. Mass spectrometer compound-dependent parameters.** Compound\_1 quantifier. Compound\_2 qualifier.

| POSITIVE IONIZATION MODE |                     |                   |                      |        |        |        |         |
|--------------------------|---------------------|-------------------|----------------------|--------|--------|--------|---------|
| Analyte or IS            | Precursor ion (m/z) | Product ion (m/z) | Retention time (min) | DP (V) | EP (V) | CE (V) | CXP (V) |
| Amphetamine_1            | 137.1               | 92.0              | 3.4                  | 30     | 10     | 21     | 10      |
| Amphetamine_2            | 137.1               | 120.1             | 3.41                 | 30     | 10     | 11     | 10      |
| Amphetamine-D5           | 142.1               | 93.0              | 3.36                 | 30     | 10     | 21     | 10      |
| BDB_1                    | 194.1               | 147.1             | 5.02                 | 30     | 10     | 18     | 10      |
| BDB_2                    | 194.1               | 177.1             | 5.02                 | 30     | 10     | 11     | 10      |
| BDB-D2                   | 196.1               | 149.1             | 5                    | 30     | 10     | 18     | 10      |
| Butylone_1               | 223.1               | 175.1             | 5.23                 | 30     | 10     | 23     | 10      |
| Butylone_2               | 223.1               | 130.1             | 5.22                 | 30     | 10     | 59     | 10      |
| Butylone-D2              | 225.1               | 177.1             | 5.21                 | 30     | 10     | 27     | 10      |
| 2C-B_1                   | 261.1               | 244.1             | 5.95                 | 20     | 10     | 17     | 10      |
| 2C-B_2                   | 261.1               | 228.1             | 5.95                 | 20     | 10     | 29     | 10      |
| 2C-B-D5                  | 266.1               | 249.1             | 5.88                 | 20     | 10     | 17     | 10      |
| 2C-I_1                   | 309.2               | 292.1             | 6.62                 | 20     | 10     | 19     | 10      |
| 2C-I_2                   | 309.2               | 277.1             | 6.61                 | 20     | 10     | 33     | 10      |
| 2C-I-D5                  | 314.2               | 297.1             | 6.56                 | 20     | 10     | 19     | 10      |
| Cathinone_1              | 150.1               | 105.1             | 3.08                 | 30     | 10     | 25     | 10      |
| Cathinone_2              | 150.1               | 117.1             | 3.07                 | 30     | 10     | 31     | 10      |
| Cathinone-D5             | 155.1               | 110.1             | 3.01                 | 30     | 10     | 25     | 10      |
| MBDB_1                   | 209.1               | 136.1             | 5.55                 | 25     | 10     | 27     | 10      |
| MBDB_2                   | 209.1               | 178.1             | 5.55                 | 25     | 10     | 15     | 10      |
| MBDB-D4                  | 213.1               | 136.1             | 5.51                 | 25     | 10     | 27     | 10      |
| MDA_1                    | 180.1               | 133.1             | 4.12                 | 40     | 10     | 25     | 10      |
| MDA_2                    | 181.1               | 164.1             | 4.14                 | 40     | 10     | 15     | 10      |
| MDA-D4                   | 185.1               | 138.1             | 4.09                 | 40     | 10     | 25     | 10      |
| MDEA_1                   | 209.1               | 164.1             | 5.25                 | 40     | 10     | 19     | 10      |
| MDEA_2                   | 209.1               | 106.1             | 5.25                 | 40     | 10     | 39     | 10      |
| MDEA-D4                  | 213.1               | 163.1             | 5.22                 | 40     | 10     | 19     | 10      |
| MDMA_1                   | 195.1               | 164.1             | 4.7                  | 30     | 10     | 17     | 10      |
| MDMA_2                   | 195.1               | 106.1             | 4.7                  | 30     | 10     | 33     | 10      |
| MDMA-D2                  | 197.1               | 163.1             | 4.68                 | 30     | 10     | 17     | 10      |
| MDPV_1                   | 277.1               | 127.1             | 6.86                 | 25     | 10     | 35     | 10      |
| MDPV_2                   | 277.1               | 176.1             | 6.85                 | 25     | 10     | 31     | 10      |
| MDPV-D7                  | 284.1               | 134.1             | 6.82                 | 25     | 10     | 37     | 10      |
| Mephedrone_1             | 179.1               | 161.1             | 5.05                 | 30     | 10     | 17     | 10      |
| Mephedrone_2             | 179.1               | 145.1             | 5.05                 | 30     | 10     | 29     | 10      |
| Mephedrone-D3            | 181.1               | 163.1             | 5.04                 | 30     | 10     | 17     | 10      |
| Methamphetamine_1        | 151.1               | 92.0              | 4.08                 | 40     | 10     | 25     | 10      |
| Methamphetamine_2        | 151.1               | 120.1             | 4.08                 | 40     | 10     | 15     | 10      |
| Methamphetamine-D4       | 155.1               | 92.0              | 4.05                 | 40     | 10     | 25     | 10      |
| Methaqualone_1           | 252.1               | 133.1             | 7.79                 | 110    | 10     | 37     | 10      |
| Methaqualone_2           | 252.1               | 66.0              | 7.79                 | 110    | 10     | 79     | 10      |
| Methaqualone-D6          | 258.1               | 139.1             | 7.74                 | 110    | 10     | 39     | 10      |
| Methylone_1              | 209.1               | 161.1             | 4.41                 | 50     | 10     | 25     | 10      |
| Methylone_2              | 209.1               | 133.1             | 4.41                 | 50     | 10     | 37     | 10      |
| Methylone-D2             | 211.1               | 163.1             | 4.4                  | 50     | 10     | 25     | 10      |
| Methylphenidate_1        | 234.1               | 85.0              | 6.19                 | 46     | 10     | 25     | 10      |
| Methylphenidate_2        | 234.1               | 56.0              | 6.19                 | 130    | 10     | 48     | 10      |
| Methylphenidate-D10      | 244.1               | 93.0              | 6.13                 | 130    | 10     | 48     | 10      |

|                            |       |       |      |     |    |    |    |
|----------------------------|-------|-------|------|-----|----|----|----|
| PMA_1                      | 167.1 | 122.1 | 4.21 | 20  | 10 | 25 | 10 |
| PMA_2                      | 167.1 | 150.1 | 4.21 | 20  | 10 | 13 | 10 |
| Ritalinic-acid_1           | 221.1 | 85.0  | 5    | 40  | 10 | 25 | 10 |
| Ritalinic-acid_2           | 220.1 | 56.0  | 5    | 40  | 10 | 61 | 10 |
| Ritalinic-acid-D4          | 224.1 | 88.0  | 4.97 | 40  | 10 | 25 | 10 |
| Alprazolam_1               | 310.2 | 282.1 | 8.69 | 80  | 10 | 37 | 10 |
| Alprazolam_2               | 310.2 | 206.1 | 8.69 | 80  | 10 | 57 | 10 |
| Alprazolam-D6              | 316.2 | 288.1 | 8.66 | 80  | 10 | 37 | 10 |
| 7-NH2-<br>Clonazepam_1     | 286.1 | 222.1 | 5.03 | 105 | 10 | 35 | 10 |
| 7-NH2-<br>Clonazepam_2     | 286.1 | 121.1 | 5.04 | 105 | 10 | 39 | 10 |
| 7-NH2-Clonazepam-<br>D4    | 290.1 | 226.1 | 4.99 | 105 | 10 | 35 | 10 |
| 7-NH2-<br>Flunitrazepam_1  | 285.1 | 136.1 | 5.93 | 100 | 10 | 37 | 10 |
| 7-NH2-<br>Flunitrazepam_2  | 284.1 | 227.1 | 5.93 | 100 | 10 | 33 | 10 |
| 7-NH2-<br>Flunitrazepam-D3 | 287.1 | 138.1 | 5.89 | 100 | 10 | 37 | 10 |
| 7-NH2-<br>Nitrazepam_1     | 252.1 | 122.1 | 4.19 | 85  | 10 | 36 | 10 |
| 7-NH2-<br>Nitrazepam_2     | 252.1 | 146.1 | 4.2  | 85  | 10 | 38 | 10 |
| 7-NH2-Nitrazepam-<br>D5    | 257.1 | 121.1 | 4.15 | 85  | 10 | 36 | 10 |
| Bromazepam_1               | 316.1 | 209.1 | 7.22 | 100 | 10 | 35 | 10 |
| Bromazepam_2               | 316.1 | 182.1 | 7.22 | 100 | 10 | 43 | 10 |
| Bromazepam-D4              | 320.1 | 213.1 | 7.18 | 100 | 10 | 35 | 10 |
| Brotizolam_1               | 393.2 | 282.1 | 8.98 | 100 | 10 | 43 | 10 |
| Brotizolam_2               | 394.2 | 315.1 | 8.98 | 100 | 10 | 33 | 10 |
| Chlordiazepoxide_1         | 301.2 | 283.1 | 7.35 | 50  | 10 | 33 | 10 |
| Chlordiazepoxide_2         | 300.2 | 247.1 | 7.35 | 50  | 10 | 45 | 10 |
| Chlordiazepoxide-<br>D5    | 305.2 | 286.1 | 7.31 | 50  | 10 | 31 | 10 |
| Clobazam_1                 | 302.2 | 260.1 | 8.29 | 120 | 10 | 29 | 10 |
| Clobazam_2                 | 301.2 | 224.1 | 8.29 | 120 | 10 | 45 | 10 |
| Clobazam-D8                | 309.2 | 267.1 | 8.25 | 120 | 10 | 31 | 10 |
| Clonazepam_1               | 316.2 | 270.1 | 7.71 | 70  | 10 | 35 | 10 |
| Clonazepam_2               | 316.2 | 214.1 | 7.71 | 70  | 10 | 52 | 10 |
| Clonazepam-D4              | 320.2 | 274.1 | 7.68 | 70  | 10 | 35 | 10 |
| Demoxepam_1                | 287.1 | 180.1 | 7.43 | 110 | 10 | 31 | 10 |
| Demoxepam_2                | 287.1 | 269.1 | 7.43 | 110 | 10 | 39 | 10 |
| Demoxepam-D5               | 292.1 | 180.1 | 7.4  | 110 | 10 | 33 | 10 |
| DA-Flurazepam_1            | 289.1 | 140.1 | 7.92 | 110 | 10 | 41 | 10 |
| DA-Flurazepam_2            | 289.1 | 226.1 | 7.92 | 110 | 10 | 39 | 10 |
| DA-Flurazepam-D4           | 293.1 | 140.1 | 7.89 | 110 | 10 | 43 | 10 |
| DM-<br>Flunitrazepam_1     | 300.2 | 254.1 | 7.41 | 30  | 10 | 35 | 10 |
| DM-<br>Flunitrazepam_2     | 300.2 | 198.1 | 7.41 | 30  | 10 | 51 | 10 |
| DM-Flunitrazepam-<br>D4    | 304.2 | 258.1 | 7.38 | 30  | 10 | 35 | 10 |
| Diazepam_1                 | 286.1 | 155.1 | 9.09 | 100 | 10 | 35 | 10 |
| Diazepam_2                 | 286.1 | 194.1 | 9.08 | 100 | 10 | 43 | 10 |
| Diazepam-D4                | 290.1 | 154.1 | 9.06 | 100 | 10 | 37 | 10 |

|                  |       |       |      |     |    |    |    |
|------------------|-------|-------|------|-----|----|----|----|
| Estazolam_1      | 296.1 | 268.1 | 8.54 | 75  | 10 | 33 | 10 |
| Estazolam_2      | 296.1 | 206.1 | 8.54 | 75  | 10 | 57 | 10 |
| Estazolam-D4     | 300.1 | 272.1 | 8.51 | 75  | 10 | 47 | 10 |
| Flunitrazepam_1  | 315.2 | 269.1 | 8.3  | 80  | 10 | 35 | 10 |
| Flunitrazepam_2  | 314.2 | 239.1 | 8.3  | 80  | 10 | 45 | 10 |
| Flunitrazepam-D3 | 317.2 | 271.1 | 8.28 | 80  | 10 | 35 | 10 |
| Flurazepam_1     | 388.2 | 315.1 | 8.18 | 90  | 10 | 35 | 10 |
| Flurazepam_2     | 388.2 | 288.1 | 8.18 | 90  | 10 | 35 | 10 |
| Flurazepam-D10   | 398.2 | 315.1 | 8.15 | 90  | 10 | 33 | 10 |
| OH-Alprazolam_1  | 325.2 | 297.1 | 8.13 | 110 | 10 | 37 | 10 |
| OH-Alprazolam_2  | 325.2 | 216.1 | 8.14 | 110 | 10 | 53 | 10 |
| OH-Alprazolam-D5 | 330.2 | 302.1 | 8.1  | 110 | 10 | 37 | 10 |
| OH-Midazolam_1   | 342.2 | 203.1 | 8.08 | 70  | 10 | 35 | 10 |
| OH-Midazolam_2   | 342.2 | 168.1 | 8.08 | 70  | 10 | 51 | 10 |
| OH-Midazolam-D4  | 346.2 | 328.1 | 8.05 | 70  | 10 | 31 | 10 |
| OH-Triazolam_1   | 359.2 | 331.1 | 7.97 | 105 | 10 | 39 | 10 |
| OH-Triazolam_2   | 359.2 | 176.1 | 7.97 | 105 | 10 | 37 | 10 |
| OH-Triazolam-D6  | 365.2 | 337.1 | 7.93 | 105 | 10 | 39 | 10 |
| OH-Bromazepam_1  | 332.2 | 303.1 | 6.37 | 80  | 10 | 27 | 10 |
| OH-Bromazepam_2  | 332.2 | 315.1 | 6.38 | 80  | 10 | 21 | 10 |
| OH-Bromazepam-D4 | 336.2 | 307.1 | 6.34 | 80  | 10 | 28 | 10 |
| Lorazepam_1      | 321.2 | 229.1 | 7.58 | 60  | 10 | 42 | 10 |
| Lorazepam_2      | 321.2 | 303.1 | 7.58 | 60  | 10 | 21 | 10 |
| Lorazepam-D4     | 325.2 | 233.1 | 7.55 | 60  | 10 | 42 | 10 |
| Lormetazepam_1   | 336.2 | 290.1 | 8.42 | 50  | 10 | 35 | 10 |
| Lormetazepam_2   | 335.2 | 177.1 | 8.41 | 50  | 10 | 53 | 10 |
| Lormetazepam-D8  | 342.2 | 296.1 | 8.4  | 50  | 10 | 35 | 10 |
| Medazepam_1      | 271.1 | 242.1 | 8.94 | 60  | 10 | 27 | 10 |
| Medazepam_2      | 272.1 | 208.1 | 8.94 | 60  | 10 | 39 | 10 |
| Medazepam-D4     | 275.1 | 246.1 | 8.92 | 60  | 10 | 27 | 10 |
| Midazolam_1      | 327.2 | 292.1 | 8.32 | 130 | 10 | 39 | 10 |
| Midazolam_2      | 326.2 | 249.1 | 8.32 | 130 | 10 | 51 | 10 |
| Midazolam-D6     | 332.2 | 297.1 | 8.29 | 130 | 10 | 39 | 10 |
| Nitrazepam_1     | 282.1 | 236.1 | 7.69 | 100 | 10 | 33 | 10 |
| Nitrazepam_2     | 282.1 | 180.1 | 7.68 | 100 | 10 | 51 | 10 |
| Nitrazepam-D5    | 287.1 | 185.1 | 7.65 | 100 | 10 | 49 | 10 |
| Norclobazam_1    | 287.1 | 245.1 | 7.57 | 70  | 10 | 29 | 10 |
| Norclobazam_2    | 287.1 | 210.1 | 7.57 | 70  | 10 | 43 | 10 |
| Norclobazam-D6   | 293.1 | 251.1 | 7.57 | 70  | 10 | 31 | 10 |
| Nordiazepam_1    | 271.1 | 140.1 | 8.28 | 90  | 10 | 37 | 10 |
| Nordiazepam_2    | 271.1 | 165.1 | 8.28 | 90  | 10 | 38 | 10 |
| Nordiazepam-D5   | 276.1 | 140.1 | 8.24 | 90  | 10 | 37 | 10 |
| Oxazepam_1       | 287.1 | 163.1 | 7.78 | 80  | 10 | 49 | 10 |
| Oxazepam_2       | 287.1 | 104.1 | 7.78 | 80  | 10 | 45 | 10 |
| Oxazepam-D5      | 292.1 | 163.1 | 7.75 | 80  | 10 | 49 | 10 |
| Prazepam_1       | 326.2 | 272.1 | 9.74 | 60  | 10 | 31 | 10 |

|                    |       |       |      |     |    |    |    |
|--------------------|-------|-------|------|-----|----|----|----|
| Prazepam_2         | 326.2 | 140.1 | 9.74 | 60  | 10 | 49 | 10 |
| Prazepam-D4        | 330.2 | 276.1 | 9.72 | 60  | 10 | 47 | 10 |
| Temazepam_1        | 302.2 | 256.1 | 8.59 | 20  | 10 | 31 | 10 |
| Temazepam_2        | 301.2 | 177.1 | 8.58 | 20  | 10 | 51 | 10 |
| Temazepam-D6       | 308.2 | 262.1 | 8.56 | 20  | 10 | 29 | 10 |
| Triazolam_1        | 343.2 | 308.1 | 8.53 | 140 | 10 | 37 | 10 |
| Triazolam_2        | 343.2 | 315.1 | 8.53 | 140 | 10 | 39 | 10 |
| Triazolam-D6       | 349.2 | 312.1 | 8.51 | 140 | 10 | 39 | 10 |
| Gabapentin_1       | 172.1 | 137.1 | 3.47 | 100 | 10 | 23 | 10 |
| Gabapentin_2       | 172.1 | 154.1 | 3.47 | 100 | 10 | 19 | 10 |
| Gabapentin-D4      | 176.1 | 139.1 | 3.44 | 100 | 10 | 23 | 10 |
| Pregebalin_1       | 160.1 | 55.0  | 2.79 | 100 | 10 | 31 | 10 |
| Pregebalin_2       | 160.1 | 83.0  | 2.79 | 100 | 10 | 21 | 10 |
| Pregebalin-D4      | 164.1 | 57.0  | 2.75 | 100 | 10 | 29 | 10 |
| Promethazine_1     | 286.1 | 87.0  | 8.6  | 55  | 10 | 25 | 10 |
| Promethazine_2     | 286.1 | 199.1 | 8.6  | 55  | 10 | 43 | 10 |
| Promethazine-D5    | 291.1 | 92.0  | 8.57 | 55  | 10 | 21 | 10 |
| Quetiapine_1       | 385.2 | 254.1 | 8.4  | 80  | 10 | 30 | 10 |
| Quetiapine_2       | 385.2 | 222.1 | 8.4  | 80  | 10 | 49 | 10 |
| Quetiapine-D3      | 388.2 | 255.1 | 8.4  | 80  | 10 | 30 | 10 |
| Benzoylcegonine_1  | 291.1 | 169.1 | 5.15 | 45  | 10 | 24 | 10 |
| Benzoylcegonine_2  | 290.1 | 82.0  | 5.15 | 45  | 10 | 32 | 10 |
| Benzoylcegonine-D3 | 293.1 | 171.1 | 5.14 | 45  | 10 | 24 | 10 |
| Cocaethylene_1     | 319.2 | 197.1 | 7.31 | 70  | 10 | 27 | 10 |
| Cocaethylene_2     | 318.2 | 82.0  | 7.31 | 70  | 10 | 37 | 10 |
| Cocaethylene-D2    | 321.2 | 199.1 | 7.3  | 70  | 10 | 27 | 10 |
| Cocaine_1          | 305.2 | 183.1 | 6.65 | 40  | 10 | 26 | 10 |
| Cocaine_2          | 304.2 | 77.0  | 6.66 | 40  | 10 | 75 | 10 |
| Cocaine-D2         | 307.2 | 185.1 | 6.65 | 56  | 10 | 26 | 10 |
| Norcocaine_1       | 291.1 | 169.1 | 6.77 | 50  | 10 | 21 | 10 |
| Norcocaine_2       | 290.1 | 105.1 | 6.77 | 50  | 10 | 44 | 10 |
| Norcocaine-D2      | 293.1 | 171.1 | 6.75 | 50  | 10 | 23 | 10 |
| THC-COOH_1         | 345.2 | 299.1 | 9.84 | 40  | 10 | 27 | 10 |
| THC-COOH_2         | 345.2 | 193.1 | 9.84 | 40  | 10 | 35 | 10 |
| THC-COOH-D3        | 348.2 | 302.1 | 9.83 | 40  | 10 | 27 | 10 |
| Acetylcodeine_1    | 342.2 | 225.1 | 6.51 | 130 | 10 | 35 | 10 |
| Acetylcodeine_2    | 342.2 | 165.1 | 6.51 | 130 | 10 | 65 | 10 |
| Acetylcodeine-D3   | 345.2 | 225.1 | 6.5  | 130 | 10 | 37 | 10 |
| Buprenorphine_1    | 468.2 | 396.1 | 7.8  | 120 | 10 | 53 | 10 |
| Buprenorphine_2    | 468.2 | 414.1 | 7.79 | 120 | 10 | 46 | 10 |
| Buprenorphine-D4   | 472.2 | 400.1 | 7.77 | 120 | 10 | 53 | 10 |
| Codeine_1          | 300.2 | 215.1 | 4.29 | 110 | 10 | 35 | 10 |
| Codeine_2          | 300.2 | 165.1 | 4.29 | 110 | 10 | 55 | 10 |
| Codeine-D6         | 306.2 | 218.1 | 4.25 | 110 | 10 | 35 | 10 |
| Dihydrocodeine_1   | 302.2 | 199.1 | 4.22 | 120 | 10 | 45 | 10 |
| Dihydrocodeine_2   | 302.2 | 128.1 | 4.22 | 120 | 10 | 79 | 10 |

|                     |       |       |      |     |    |    |    |
|---------------------|-------|-------|------|-----|----|----|----|
| Dihydrocodeine-D6   | 308.2 | 202.1 | 4.17 | 120 | 10 | 43 | 10 |
| EDDP_1              | 279.1 | 234.1 | 9    | 40  | 10 | 43 | 10 |
| EDDP_2              | 279.1 | 250.1 | 9.01 | 40  | 10 | 33 | 10 |
| EDDP-D3             | 281.1 | 234.1 | 8.99 | 40  | 10 | 43 | 10 |
| Fentanyl_1          | 337.2 | 188.1 | 7.87 | 80  | 10 | 31 | 10 |
| Fentanyl_2          | 337.2 | 105.1 | 7.87 | 80  | 10 | 52 | 10 |
| Fentanyl-D5         | 342.2 | 188.1 | 7.83 | 80  | 10 | 31 | 10 |
| Hydrocodone_1       | 300.2 | 199.1 | 4.77 | 160 | 10 | 39 | 10 |
| Hydrocodone_2       | 300.2 | 171.1 | 4.77 | 160 | 10 | 51 | 10 |
| Hydrocodone-D6      | 306.2 | 202.1 | 4.73 | 160 | 10 | 41 | 10 |
| Hydromorphone_1     | 286.1 | 185.1 | 3.15 | 120 | 10 | 39 | 10 |
| Hydromorphone_2     | 286.1 | 157.1 | 3.14 | 120 | 10 | 53 | 10 |
| Hydromorphone-D3    | 289.1 | 185.1 | 3.11 | 120 | 10 | 41 | 10 |
| Meconin_1           | 195.1 | 105.1 | 5.71 | 50  | 10 | 43 | 10 |
| Meconin_2           | 195.1 | 77.0  | 5.71 | 50  | 10 | 48 | 10 |
| Meconin-D3          | 198.1 | 105.1 | 5.69 | 50  | 10 | 40 | 10 |
| Meperidine_1        | 248.1 | 174.1 | 6.36 | 90  | 10 | 27 | 10 |
| Meperidine_2        | 248.1 | 70.0  | 6.36 | 90  | 10 | 35 | 10 |
| Meperidine-D4       | 252.1 | 178.1 | 6.34 | 90  | 10 | 29 | 10 |
| Methadone_1         | 311.2 | 265.1 | 9.49 | 40  | 10 | 21 | 10 |
| Methadone_2         | 311.2 | 106.1 | 9.49 | 40  | 10 | 33 | 10 |
| Methadone-D8        | 319.2 | 268.1 | 9.46 | 40  | 10 | 21 | 10 |
| 6-MAM_1             | 328.2 | 165.1 | 4.28 | 130 | 10 | 52 | 10 |
| 6-MAM_2             | 328.2 | 211.1 | 4.28 | 130 | 10 | 35 | 10 |
| 6-MAM-D6            | 334.2 | 165.1 | 4.26 | 130 | 10 | 52 | 10 |
| Morphine_1          | 286.1 | 165.1 | 2.66 | 120 | 10 | 52 | 10 |
| Morphine_2          | 286.1 | 201.1 | 2.66 | 120 | 10 | 35 | 10 |
| Morphine-D3         | 289.1 | 165.1 | 2.63 | 120 | 10 | 52 | 10 |
| Naloxone_1          | 328.2 | 310.1 | 4.03 | 110 | 10 | 27 | 10 |
| Naloxone_2          | 328.2 | 212.1 | 4.03 | 110 | 10 | 53 | 10 |
| Naloxone-D5         | 333.2 | 315.1 | 3.99 | 110 | 10 | 27 | 10 |
| Naltrexone_1        | 342.2 | 270.1 | 4.67 | 70  | 10 | 37 | 10 |
| Naltrexone_2        | 342.2 | 267.1 | 4.67 | 70  | 10 | 37 | 10 |
| Naltrexone-D3       | 345.2 | 270.1 | 4.64 | 70  | 10 | 39 | 10 |
| Norbuprenorphine_1  | 414.2 | 83.0  | 6.85 | 120 | 10 | 73 | 10 |
| Norbuprenorphine_2  | 414.2 | 187.1 | 6.85 | 120 | 10 | 48 | 10 |
| Norbuprenorphine-D3 | 417.2 | 83.0  | 6.84 | 120 | 10 | 73 | 10 |
| Norcodeine_1        | 286.1 | 165.1 | 3.59 | 120 | 10 | 57 | 10 |
| Norcodeine_2        | 286.1 | 152.1 | 3.59 | 120 | 10 | 81 | 10 |
| Norcodeine-D3       | 289.1 | 152.1 | 3.55 | 120 | 10 | 83 | 10 |
| Norfentanyl_1       | 233.1 | 84.0  | 5.69 | 55  | 10 | 23 | 10 |
| Norfentanyl_2       | 233.1 | 55.0  | 5.69 | 55  | 10 | 53 | 10 |
| Norfentanyl-D5      | 238.1 | 84.0  | 5.65 | 55  | 10 | 25 | 10 |
| Normeperidine_1     | 235.1 | 161.1 | 6.3  | 70  | 10 | 23 | 10 |

|                  |       |       |      |     |    |     |    |
|------------------|-------|-------|------|-----|----|-----|----|
| Normeperidine_2  | 234.1 | 188.1 | 6.3  | 70  | 10 | 19  | 10 |
| Normeperidine-D4 | 238.1 | 164.1 | 6.28 | 70  | 10 | 23  | 10 |
| Nortapentadol_1  | 209.1 | 108.1 | 5.34 | 62  | 10 | 30  | 10 |
| Nortapentadol_2  | 208.1 | 121.1 | 5.35 | 28  | 10 | 62  | 10 |
| Nortilidine_1    | 261.1 | 155.1 | 6.46 | 30  | 10 | 24  | 10 |
| Nortilidine_2    | 261.1 | 230.1 | 6.46 | 30  | 10 | 15  | 10 |
| Nortilidine-D2   | 263.1 | 155.1 | 6.45 | 30  | 10 | 24  | 10 |
| O-DM-Tramadol_1  | 250.1 | 58.0  | 4.23 | 120 | 10 | 47  | 10 |
| O-DM-Tramadol_2  | 250.1 | 42.0  | 4.23 | 120 | 10 | 105 | 10 |
| O-DM-Tramadol-D6 | 256.1 | 64.0  | 4.21 | 120 | 10 | 49  | 10 |
| Oxycodone_1      | 316.2 | 298.1 | 4.58 | 90  | 10 | 27  | 10 |
| Oxycodone_2      | 316.2 | 241.1 | 4.58 | 90  | 10 | 39  | 10 |
| Oxycodone-D6     | 322.2 | 304.1 | 4.53 | 90  | 10 | 27  | 10 |
| Oxymorphone_1    | 302.2 | 227.1 | 2.78 | 110 | 10 | 37  | 10 |
| Oxymorphone_2    | 302.2 | 284.1 | 2.78 | 110 | 10 | 27  | 10 |
| Oxymorphone-D3   | 305.2 | 230.1 | 2.74 | 110 | 10 | 37  | 10 |
| Papaverine_1     | 341.2 | 203.1 | 8.24 | 114 | 10 | 36  | 10 |
| Papaverine_2     | 340.2 | 296.1 | 8.24 | 114 | 10 | 47  | 10 |
| Papaverine-D3    | 343.2 | 205.1 | 8.21 | 114 | 10 | 40  | 10 |
| Propoxyphene_1   | 341.2 | 58.0  | 8.34 | 50  | 10 | 49  | 10 |
| Propoxyphene_2   | 341.2 | 267.1 | 8.34 | 50  | 10 | 13  | 10 |
| Propoxyphene-D4  | 345.2 | 58.0  | 8.32 | 50  | 10 | 13  | 10 |
| Sufentanil_1     | 388.2 | 238.1 | 8.57 | 70  | 10 | 27  | 10 |
| Sufentanil_2     | 388.2 | 112.1 | 8.56 | 70  | 10 | 47  | 10 |
| Sufentanil-D4    | 392.2 | 238.1 | 8.54 | 70  | 10 | 27  | 10 |
| Tapentadol_1     | 223.1 | 108.1 | 5.45 | 20  | 10 | 33  | 10 |
| Tapentadol_2     | 222.1 | 121.1 | 5.45 | 20  | 10 | 29  | 10 |
| Tapentadol-D3    | 225.1 | 107.1 | 5.45 | 20  | 10 | 33  | 10 |
| Thebaine_1       | 312.2 | 58.0  | 7.36 | 30  | 10 | 45  | 10 |
| Thebaine_2       | 312.2 | 251.1 | 7.36 | 30  | 10 | 41  | 10 |
| Thebaine-D3      | 315.2 | 61.0  | 7.35 | 30  | 10 | 45  | 10 |
| Tilidine_1       | 275.1 | 155.1 | 6.98 | 40  | 10 | 27  | 10 |
| Tilidine_2       | 275.1 | 78.0  | 6.98 | 40  | 10 | 63  | 10 |
| Tilidine-D5      | 280.1 | 155.1 | 6.96 | 40  | 10 | 31  | 10 |
| Tramadol_1       | 265.1 | 58.1  | 5.88 | 40  | 10 | 45  | 10 |
| Tramadol_2       | 264.1 | 42.1  | 5.88 | 40  | 10 | 105 | 10 |
| Tramadol-D3      | 267.1 | 58.1  | 5.86 | 40  | 10 | 51  | 10 |
| Zaleplon_1       | 307.2 | 237.1 | 8.22 | 100 | 10 | 37  | 10 |
| Zaleplon_2       | 307.2 | 234.1 | 8.22 | 100 | 10 | 53  | 10 |
| Zaleplon-D3      | 311.2 | 237.1 | 8.19 | 100 | 10 | 40  | 10 |
| Zolpidem_1       | 309.2 | 235.1 | 7.6  | 25  | 10 | 47  | 10 |
| Zolpidem_2       | 309.2 | 264.1 | 7.6  | 25  | 10 | 37  | 10 |
| Zolpidem-D5      | 314.2 | 235.1 | 7.55 | 25  | 10 | 53  | 10 |
| Zopiclone_1      | 390.2 | 246.1 | 6.58 | 30  | 10 | 23  | 10 |
| Zopiclone_2      | 390.2 | 218.1 | 6.59 | 30  | 10 | 46  | 10 |
| Zopiclone-D3     | 393.2 | 245.1 | 6.57 | 30  | 10 | 23  | 10 |

| Ketamine_1                      | 239.1                      | 126.1                    | 6.23                        | 40            | 10            | 33            | 10             |
|---------------------------------|----------------------------|--------------------------|-----------------------------|---------------|---------------|---------------|----------------|
| Ketamine_2                      | 238.1                      | 220.1                    | 6.23                        | 40            | 10            | 20            | 10             |
| Ketamine-D4                     | 242.1                      | 129.1                    | 6.19                        | 40            | 10            | 33            | 10             |
| LSD_1                           | 324.2                      | 223.1                    | 7.06                        | 25            | 10            | 33            | 10             |
| LSD_2                           | 324.2                      | 208.1                    | 7.07                        | 25            | 10            | 41            | 10             |
| LSD-D3                          | 327.2                      | 226.1                    | 7.05                        | 25            | 10            | 33            | 10             |
| Mescaline_1                     | 212.1                      | 165.1                    | 3.43                        | 20            | 10            | 31            | 10             |
| Mescaline_2                     | 212.1                      | 180.1                    | 3.43                        | 20            | 10            | 25            | 10             |
| Mescaline-D9                    | 221.1                      | 171.1                    | 3.34                        | 20            | 10            | 31            | 10             |
| Norketamine_1                   | 225.1                      | 126.1                    | 5.63                        | 50            | 10            | 35            | 10             |
| Norketamine_2                   | 225.1                      | 208.1                    | 5.63                        | 50            | 10            | 17            | 10             |
| Norketamine-D3                  | 228.1                      | 129.1                    | 5.58                        | 50            | 10            | 33            | 10             |
| O-H-LSD_1                       | 356.2                      | 222.1                    | 4.82                        | 60            | 10            | 45            | 10             |
| O-H-LSD_2                       | 356.2                      | 166.1                    | 4.82                        | 60            | 10            | 71            | 10             |
| PCP_1                           | 244.1                      | 86.0                     | 8.41                        | 40            | 10            | 17            | 10             |
| PCP_2                           | 244.1                      | 91.0                     | 8.41                        | 40            | 10            | 37            | 10             |
| PCP-D5                          | 249.1                      | 86.0                     | 8.38                        | 40            | 10            | 17            | 10             |
| <b>NEGATIVE IONIZATION MODE</b> |                            |                          |                             |               |               |               |                |
| <b>Analyte or IS</b>            | <b>Precursor ion (m/z)</b> | <b>Product ion (m/z)</b> | <b>Retention time (min)</b> | <b>DP (V)</b> | <b>EP (V)</b> | <b>CE (V)</b> | <b>CXP (V)</b> |
| Allobarbital_1                  | 207.0                      | 42.0                     | 4.08                        | -50           | -10           | -40           | -10            |
| Allobarbital_2                  | 207.0                      | 84.9                     | 4.08                        | -50           | -10           | -17           | -10            |
| Amobarbital_1                   | 225.0                      | 42.0                     | 5.91                        | -50           | -10           | -45           | -10            |
| Amobarbital_2                   | 225.0                      | 181.9                    | 5.91                        | -50           | -10           | -18           | -10            |
| Barbital_1                      | 183.0                      | 42.0                     | 2.83                        | -50           | -10           | -40           | -10            |
| Barbital_2                      | 183.0                      | 139.9                    | 2.83                        | -50           | -10           | -17           | -10            |
| Butalbital_1                    | 223.0                      | 42.0                     | 5.26                        | -50           | -10           | -45           | -10            |
| Butalbital_2                    | 223.0                      | 179.9                    | 5.26                        | -50           | -10           | -17           | -10            |
| Butalbital-D5                   | 228.0                      | 42.0                     | 5.23                        | -50           | -10           | -40           | -10            |
| Hexobarbital_1                  | 234.9                      | 42.0                     | 6.28                        | -45           | -10           | -45           | -10            |
| Pentobarbital_1                 | 225.0                      | 42.0                     | 6.01                        | -55           | -10           | -40           | -10            |
| Pentobarbital_2                 | 225.0                      | 181.9                    | 6.01                        | -55           | -10           | -17           | -10            |
| Pentobarbital-D5                | 230                        | 42.0                     | 5.99                        | -55           | -10           | -40           | -10            |
| Phenobarbital_1                 | 230.9                      | 42.0                     | 5.05                        | -35           | -10           | -40           | -10            |
| Phenobarbital_2                 | 230.9                      | 187.9                    | 5.05                        | -35           | -10           | -15           | -10            |
| Phenobarbital-D5                | 235.9                      | 42.0                     | 5.01                        | -35           | -10           | -40           | -10            |
| Secbutabarbital_1               | 211                        | 42.0                     | 5.09                        | -40           | -10           | -40           | -10            |
| Secbutabarbital_2               | 211                        | 167.9                    | 5.09                        | -40           | -10           | -20           | -10            |
| Secobarbital_1                  | 236.9                      | 42                       | 6.37                        | -40           | -10           | -40           | -10            |
| Secobarbital_2                  | 236.9                      | 193.9                    | 6.37                        | -40           | -10           | -17           | -10            |
| Secobarbital-D5                 | 241.9                      | 42.0                     | 6.37                        | -40           | -10           | -40           | -10            |
| Thiopental_1                    | 240.9                      | 58.0                     | 6.74                        | -35           | -10           | -45           | -10            |
| Thiopental_2                    | 240.9                      | 100.9                    | 6.74                        | -35           | -10           | -20           | -10            |

Table S2. Evaluation of sensitivity.

| Compound               | Limit of quantification (µg/L) | Limit of detection (µg/L) |
|------------------------|--------------------------------|---------------------------|
| Amphetamine            | 10.85                          | 2.17                      |
| BDB                    | 26.7                           | 2.17                      |
| Butylone               | 11.05                          | 0.442                     |
| 2C-B                   | 23.9                           | 1.93                      |
| 2C-I                   | 10.45                          | 2.09                      |
| Cathinone              | 11,175                         | 2,235                     |
| MBDB                   | 10.65                          | 0.426                     |
| MDA                    | 25.2                           | 0.212                     |
| MDEA                   | 26.7                           | 0.421                     |
| MDMA                   | 25.8                           | 0.396                     |
| MDPV                   | 27.1                           | 2,145                     |
| Mephedrone             | 26.8                           | 2,095                     |
| Methamphetamine        | 4.33                           | 0.433                     |
| Methaqualone           | 27.6                           | 2.12                      |
| Methylone              | 3.91                           | 1,955                     |
| Methylphenidate        | 27.5                           | 2.18                      |
| PMA                    | 27.3                           | 2.1                       |
| Ritalinic acid         | 25.5                           | 2,015                     |
| Alprazolam             | 26.1                           | 0.21                      |
| 7-Aminoclonazepam      | 9,425                          | 0.1885                    |
| 7-Aminoflunitrazepam   | 9,225                          | 1,845                     |
| 7-Aminonitrazepam      | 29.6                           | 0.251                     |
| Bromazepam             | 26.9                           | 2,115                     |
| Brotizolam             | 27.9                           | 2,235                     |
| Chlordiazepoxide       | 8.5                            | 8.5                       |
| Clobazam               | 28                             | 0.2105                    |
| Clonazepam             | 25.6                           | 0.404                     |
| Demoxepam              | 2.16                           | 0.432                     |
| Desalkylflurazepam     | 27.2                           | 0.2125                    |
| Desmethylflunitrazepam | 28.9                           | 0.227                     |
| Diazepam               | 10,725                         | 4.29                      |
| Estazolam              | 29.9                           | 2.34                      |
| Flunitrazepam          | 26.2                           | 4.15                      |
| Flurazepam             | 26.9                           | 2.06                      |
| α-Hydroxyalprazolam    | 25.4                           | 2,045                     |
| α-Hydroxymidazolam     | 4.24                           | 0.212                     |
| α-Hydroxytriazolam     | 10.3                           | 2.06                      |
| 3-Hydroxybromazepam    | 25.5                           | 2,035                     |
| Lorazepam              | 10,325                         | 2,065                     |
| Lormetazepam           | 26.7                           | 2.22                      |
| Medazepam              | 2,235                          | 0.447                     |
| Midazolam              | 25.2                           | 0.393                     |
| Nitrazepam             | 21.7                           | 0.185                     |



|                                  |        |        |
|----------------------------------|--------|--------|
| Norclobazam                      | 28.7   | 0.449  |
| Nordiazepam                      | 27.2   | 0.224  |
| Oxazepam                         | 4.13   | 2,065  |
| Prazepam                         | 28.8   | 0.228  |
| Temazepam                        | 25.4   | 2.09   |
| Triazolam                        | 10,775 | 0.2155 |
| Gabapentin                       | 10,475 | 2,095  |
| Pregabalin                       | 10.25  | 0.205  |
| Promethazine                     | 10.5   | 2.1    |
| Quetiapine                       | 27.2   | 0.214  |
| Benzoylcegonine                  | 15.5   | 1.24   |
| Cocaethylene                     | 16.9   | 0.267  |
| Cocaine                          | 16.9   | 0.133  |
| Norcocaine                       | 15.5   | 1,215  |
| 11-nor-9-Carboxy- $\Delta$ 9-THC | 6.96   | 2.65   |
| Acetylcodeine                    | 10,975 | 0.022  |
| Buprenorphine                    | 0.843  | 0.0084 |
| Codeine                          | 4,775  | 0.0955 |
| Dihydrocodeine                   | 12.2   | 0.0975 |
| EDDP                             | 26     | 2.04   |
| Fentanyl                         | 5.07   | 0.0392 |
| Hydrocodone                      | 5.6    | 0.112  |
| Hydromorphone                    | 5.49   | 0.0438 |
| Meconin                          | 9,775  | 1,955  |
| Meperidine                       | 13.3   | 0.216  |
| Methadone                        | 28.5   | 4.55   |
| 6-Monoacetylmorphine             | 2.68   | 0.2155 |
| Morphine                         | 1,065  | 0.213  |
| Naloxone                         | 28.2   | 0.2235 |
| Naltrexone                       | 28     | 0.434  |
| Norbuprenorphine                 | 0.594  | 0.594  |
| Norcodeine                       | 5,675  | 1,135  |
| Norfentanyl                      | 5.81   | 0.0907 |
| Normeperidine                    | 15.1   | 5,825  |
| Nortapentadol                    | 6.05   | 1.21   |
| Nortilidine                      | 27.7   | 2,175  |
| O-Desmethyltramadol              | 4.27   | 0.2135 |
| Oxycodone                        | 2,125  | 0.2125 |
| Oxymorphone                      | 2.1    | 0.105  |
| Papaverine                       | 28.3   | 2,275  |
| Propoxyphene                     | 28.3   | 0.436  |
| Sufentanil                       | 27.8   | 0.437  |
| Tapentadol                       | 12.9   | 2.03   |
| Thebaine                         | 25.6   | 0.408  |
| Tilidine                         | 26.3   | 0.42   |
| Tramadol                         | 2,095  | 0.2095 |

|                     |        |        |
|---------------------|--------|--------|
| Zaleplon            | 24.6   | 0.2045 |
| Zolpidem            | 11,175 | 0.447  |
| Zopiclone           | 10,525 | 0.421  |
| Ketamine            | 10,675 | 0.427  |
| LSD                 | 0.477  | 0.0372 |
| Mescaline           | 5.15   | 0.884  |
| Norketamine         | 4.54   | 0.454  |
| 2-Oxo-3-hydroxy-LSD | 0.2125 | 0.0043 |
| PCP                 | 5.58   | 0.0863 |
| Allobarbitol        | 79.6   | 12.4   |
| Amobarbitol         | 81.5   | 81.5   |
| Barbitol            | 73.7   | 31.25  |
| Butalbitol          | 77.8   | 30.75  |
| Hexobarbitol        | 84.6   | 84.6   |
| Pentobarbitol       | 67.4   | 67.4   |
| Phenobarbitol       | 77     | 31     |
| Secbutabarbitol     | 80     | 31     |
| Secobarbitol        | 74.3   | 74.3   |
| Thiopental          | 74.2   | 1.15   |

**Table S3. Evaluation of matrix effect, recovery and efficiency of the entire process.**

| Compound            | Matrix effect (%) |        |        | Recovery (%) |        |        | Process efficiency (%) |        |        |
|---------------------|-------------------|--------|--------|--------------|--------|--------|------------------------|--------|--------|
|                     | QCI               | QCII   | QCIII  | QCI          | QCII   | QCIII  | QCI                    | QCII   | QCIII  |
| Amphetamine         | 99.52             | 100.02 | 95.24  | 104.50       | 107.87 | 107.67 | 104.00                 | 107.89 | 102.55 |
| BDB                 | 111.32            | 92.63  | 95.15  | 97.78        | 106.93 | 110.20 | 108.85                 | 99.05  | 104.85 |
| Butylone            | 91.76             | 95.03  | 92.62  | 118.79       | 107.36 | 110.42 | 109.00                 | 102.02 | 102.27 |
| 2C-B                | 97.72             | 100.44 | 96.94  | 104.38       | 101.92 | 105.24 | 101.99                 | 102.36 | 102.02 |
| 2C-I                | 103.18            | 99.18  | 94.04  | 106.75       | 105.85 | 108.17 | 110.15                 | 104.98 | 101.72 |
| Cathinone           | 97.70             | 100.51 | 97.05  | 108.15       | 106.95 | 111.26 | 105.65                 | 107.49 | 107.98 |
| MBDB                | 103.75            | 91.00  | 94.68  | 102.47       | 112.90 | 107.27 | 106.31                 | 102.74 | 101.56 |
| MDA                 | 92.99             | 98.32  | 98.13  | 113.98       | 106.11 | 112.00 | 105.99                 | 104.33 | 109.90 |
| MDEA                | 91.83             | 93.54  | 86.93  | 103.23       | 111.38 | 112.64 | 94.79                  | 104.19 | 97.91  |
| MDMA                | 99.58             | 94.54  | 89.18  | 102.25       | 102.64 | 114.73 | 101.83                 | 97.03  | 102.32 |
| MDPV                | 111.52            | 96.82  | 97.66  | 97.59        | 110.88 | 106.46 | 108.82                 | 107.35 | 103.97 |
| Mephedrone          | 97.65             | 100.83 | 90.35  | 109.74       | 102.16 | 113.88 | 107.16                 | 103.01 | 102.88 |
| Methamphetamine     | 97.98             | 97.86  | 95.49  | 110.27       | 111.95 | 110.45 | 108.05                 | 109.56 | 105.47 |
| Methaqualone        | 70.05             | 75.45  | 70.79  | 97.52        | 100.14 | 111.22 | 68.32                  | 75.55  | 78.73  |
| Methylone           | 96.38             | 93.92  | 89.82  | 114.64       | 107.27 | 111.39 | 110.49                 | 100.75 | 100.05 |
| Methylphenidate     | 95.30             | 95.59  | 89.68  | 108.58       | 108.94 | 101.52 | 103.47                 | 104.13 | 91.04  |
| PMA                 | 89.10             | 91.29  | 90.34  | 122.40       | 111.20 | 116.10 | 109.06                 | 101.51 | 104.89 |
| Ritalinic-acid      | 99.53             | 98.16  | 86.59  | 88.54        | 111.91 | 124.42 | 88.13                  | 109.86 | 107.73 |
| Alprazolam          | 87.25             | 73.77  | 97.39  | 104.04       | 115.28 | 93.82  | 90.78                  | 85.04  | 91.38  |
| 7-NH2-Clonazepam    | 93.71             | 93.65  | 96.63  | 106.33       | 99.35  | 98.05  | 99.64                  | 93.04  | 94.75  |
| 7-NH2-Flunitrazepam | 101.34            | 100.76 | 101.36 | 97.30        | 111.61 | 97.93  | 98.61                  | 112.46 | 99.26  |

|                  |        |        |        |        |        |        |        |        |        |
|------------------|--------|--------|--------|--------|--------|--------|--------|--------|--------|
| 7-NH2-Nitrazepam | 101.20 | 98.64  | 84.93  | 79.09  | 79.00  | 88.37  | 80.04  | 77.92  | 75.05  |
| Bromazepam       | 95.51  | 92.19  | 92.18  | 103.14 | 117.39 | 112.73 | 98.51  | 108.22 | 103.91 |
| Brotizolam       | 91.32  | 89.78  | 91.65  | 137.87 | 142.04 | 144.71 | 125.90 | 127.53 | 132.62 |
| Chlordiazepoxide | 88.17  | 94.96  | 91.36  | 110.88 | 114.06 | 109.74 | 97.77  | 108.31 | 100.26 |
| Clobazam         | 91.94  | 89.57  | 91.99  | 122.09 | 108.72 | 116.80 | 112.25 | 97.38  | 107.45 |
| Clonazepam       | 100.52 | 98.61  | 87.23  | 107.99 | 103.62 | 117.11 | 108.55 | 102.18 | 102.16 |
| Demoxepam        | 96.71  | 94.09  | 86.95  | 100.59 | 114.41 | 119.28 | 97.28  | 107.65 | 103.71 |
| DA-Flurazepam    | 102.20 | 102.52 | 98.45  | 112.13 | 118.45 | 110.71 | 114.59 | 121.43 | 109.00 |
| DM-Flunitrazepam | 91.52  | 94.23  | 91.88  | 111.08 | 104.26 | 114.82 | 101.66 | 98.24  | 105.50 |
| Diazepam         | 97.90  | 92.37  | 93.40  | 124.31 | 121.64 | 120.89 | 121.70 | 112.36 | 112.92 |
| Estazolam        | 97.92  | 91.57  | 94.92  | 110.00 | 110.40 | 114.73 | 107.72 | 101.09 | 108.91 |
| Flunitrazepam    | 83.39  | 88.89  | 90.11  | 109.11 | 100.39 | 114.28 | 90.98  | 89.23  | 102.98 |
| Flurazepam       | 95.71  | 95.16  | 92.53  | 104.99 | 107.14 | 112.05 | 100.49 | 101.95 | 103.68 |
| OH-Alprazolam    | 90.67  | 120.45 | 89.76  | 125.52 | 106.44 | 113.75 | 113.81 | 128.21 | 102.10 |
| OH-Midazolam     | 98.24  | 101.09 | 97.13  | 110.69 | 98.03  | 98.88  | 108.74 | 99.10  | 96.04  |
| OH-Triazolam     | 76.38  | 84.84  | 81.00  | 106.59 | 105.57 | 103.06 | 81.41  | 89.57  | 83.48  |
| OH-Bromazepam    | 87.22  | 93.72  | 90.35  | 128.60 | 111.50 | 112.45 | 112.17 | 104.50 | 101.60 |
| Lorazepam        | 100.89 | 89.38  | 94.32  | 100.29 | 114.11 | 110.28 | 101.19 | 101.99 | 104.02 |
| Lormetazepam     | 94.35  | 91.17  | 99.11  | 115.17 | 126.56 | 115.32 | 108.66 | 115.39 | 114.29 |
| Medazepam        | 101.32 | 98.70  | 88.93  | 101.09 | 102.58 | 108.16 | 102.42 | 101.25 | 96.19  |
| Midazolam        | 99.68  | 96.11  | 90.08  | 121.57 | 97.85  | 110.23 | 121.19 | 94.04  | 99.30  |
| Nitrazepam       | 88.20  | 89.61  | 90.76  | 124.55 | 107.46 | 104.80 | 109.86 | 96.30  | 95.12  |
| Norclobazam      | 100.25 | 95.56  | 93.82  | 110.12 | 106.10 | 111.39 | 110.39 | 101.39 | 104.50 |
| Nordiazepam      | 101.68 | 96.70  | 91.55  | 82.87  | 91.41  | 87.20  | 84.26  | 88.39  | 79.82  |
| Oxazepam         | 102.29 | 103.23 | 92.23  | 117.24 | 123.35 | 119.33 | 119.93 | 127.33 | 110.06 |
| Prazepam         | 94.25  | 92.16  | 90.62  | 109.89 | 109.23 | 114.56 | 103.57 | 100.67 | 103.81 |
| Temazepam        | 99.64  | 94.67  | 94.11  | 103.82 | 115.62 | 107.63 | 103.45 | 109.45 | 101.29 |
| Triazolam        | 100.43 | 104.81 | 86.14  | 114.76 | 110.83 | 124.91 | 115.26 | 116.16 | 107.59 |
| Gabapentin       | 100.28 | 96.72  | 92.50  | 104.86 | 104.69 | 111.01 | 105.16 | 101.25 | 102.68 |
| Pregebalin       | 102.44 | 99.57  | 94.46  | 104.07 | 104.33 | 112.17 | 106.62 | 103.88 | 105.96 |
| Promethazine     | 109.09 | 108.47 | 93.91  | 111.01 | 100.67 | 116.51 | 121.11 | 109.19 | 109.42 |
| Quetiapine       | 101.50 | 94.34  | 89.56  | 114.73 | 104.63 | 111.52 | 116.44 | 98.71  | 99.88  |
| Benzoylcegonine  | 92.05  | 93.71  | 88.65  | 114.27 | 111.08 | 110.29 | 105.18 | 104.10 | 97.77  |
| Cocaethylene     | 104.47 | 93.86  | 86.46  | 105.98 | 109.19 | 115.59 | 110.72 | 102.49 | 99.94  |
| Cocaine          | 85.15  | 97.64  | 91.48  | 101.83 | 106.32 | 105.90 | 86.70  | 103.81 | 96.88  |
| Norcocaine       | 97.53  | 98.71  | 90.44  | 106.10 | 111.22 | 115.79 | 103.48 | 109.79 | 104.72 |
| THC-COOH         | 81.73  | 75.96  | 73.32  | 339.42 | 421.61 | 362.67 | 277.40 | 320.24 | 265.89 |
| Acetylcodeine    | 98.11  | 99.26  | 101.88 | 109.33 | 107.84 | 96.46  | 107.27 | 107.05 | 98.27  |
| Buprenorphine    | 70.65  | 76.58  | 88.22  | 250.65 | 128.38 | 94.33  | 177.07 | 98.32  | 83.22  |
| Codeine          | 100.31 | 108.80 | 85.77  | 107.02 | 105.59 | 104.81 | 107.35 | 114.88 | 89.89  |
| Dihydrocodeine   | 98.46  | 96.79  | 89.53  | 109.41 | 105.38 | 108.42 | 107.73 | 101.99 | 97.07  |
| EDDP             | 95.70  | 96.41  | 91.69  | 113.48 | 109.93 | 106.26 | 108.60 | 105.98 | 97.43  |
| Fentanyl         | 88.14  | 97.69  | 94.59  | 125.95 | 109.01 | 108.67 | 111.01 | 106.49 | 102.80 |
| Hydrocodone      | 98.55  | 98.85  | 93.18  | 105.96 | 112.49 | 113.45 | 104.42 | 111.19 | 105.71 |
| Hydromorphone    | 110.64 | 94.74  | 92.95  | 102.96 | 111.65 | 105.82 | 113.92 | 105.78 | 98.36  |
| Meconin          | 102.92 | 93.90  | 96.81  | 103.36 | 109.47 | 103.60 | 106.38 | 102.80 | 100.29 |

|                  |        |        |        |        |        |        |        |        |        |
|------------------|--------|--------|--------|--------|--------|--------|--------|--------|--------|
| Meperidine       | 100.12 | 101.23 | 91.84  | 98.89  | 105.82 | 111.96 | 99.02  | 107.13 | 102.82 |
| Methadone        | 98.48  | 95.08  | 89.09  | 118.41 | 115.13 | 114.35 | 116.61 | 109.46 | 101.88 |
| 6-MAM            | 79.52  | 94.99  | 96.58  | 103.24 | 116.18 | 104.71 | 82.09  | 110.36 | 101.13 |
| Morphine         | 99.84  | 95.40  | 93.98  | 107.29 | 106.94 | 108.02 | 107.12 | 102.02 | 101.52 |
| Naloxone         | 96.02  | 88.67  | 85.91  | 107.24 | 113.25 | 114.07 | 102.97 | 100.43 | 97.99  |
| Naltrexone       | 96.75  | 91.43  | 89.00  | 106.86 | 116.32 | 108.87 | 103.39 | 106.35 | 96.89  |
| Norbuprenorphine | 259.59 | 74.58  | 89.73  | 101.39 | 171.65 | 100.47 | 263.19 | 128.02 | 90.15  |
| Norcodeine       | 99.70  | 101.90 | 96.42  | 105.70 | 103.29 | 103.33 | 105.38 | 105.25 | 99.63  |
| Norfentanyl      | 101.19 | 89.15  | 85.29  | 110.91 | 111.18 | 110.61 | 112.22 | 99.12  | 94.33  |
| Normeperidine    | 105.07 | 92.90  | 94.38  | 100.84 | 113.35 | 111.76 | 105.95 | 105.30 | 105.48 |
| Norpropoxyphene  | 113.35 | 92.85  | 99.60  | 137.80 | 171.40 | 136.86 | 156.20 | 159.14 | 136.31 |
| Nortapentadol    | 94.49  | 86.50  | 87.14  | 107.01 | 110.03 | 108.48 | 101.11 | 95.18  | 94.53  |
| Nortilidine      | 112.05 | 94.64  | 94.40  | 105.51 | 110.08 | 103.79 | 118.22 | 104.18 | 97.98  |
| O-DM-Tramadol    | 102.53 | 112.32 | 92.29  | 103.81 | 102.87 | 113.49 | 106.44 | 115.55 | 104.75 |
| Oxycodone        | 96.40  | 101.14 | 93.85  | 110.77 | 104.00 | 109.53 | 106.78 | 105.18 | 102.80 |
| Oxymorphone      | 105.55 | 100.75 | 92.30  | 110.79 | 115.70 | 111.15 | 116.94 | 116.57 | 102.59 |
| Papaverine       | 89.89  | 95.65  | 83.82  | 120.44 | 120.73 | 117.94 | 108.26 | 115.47 | 98.86  |
| Propoxyphene     | 94.51  | 98.58  | 87.23  | 105.91 | 105.16 | 114.67 | 100.09 | 103.66 | 100.02 |
| Sufentanil       | 99.79  | 99.46  | 90.49  | 118.69 | 110.27 | 115.50 | 118.43 | 109.68 | 104.51 |
| Tapentadol       | 109.71 | 95.35  | 88.64  | 103.22 | 109.05 | 106.95 | 113.25 | 103.98 | 94.80  |
| Thebaine         | 96.14  | 93.50  | 95.14  | 115.66 | 116.36 | 113.62 | 111.20 | 108.79 | 108.09 |
| Tilidine         | 96.31  | 102.03 | 93.93  | 104.05 | 106.97 | 111.53 | 100.21 | 109.14 | 104.76 |
| Tramadol         | 101.01 | 95.48  | 92.71  | 101.92 | 108.26 | 118.11 | 102.95 | 103.36 | 109.50 |
| Zaleplon         | 103.69 | 107.57 | 89.67  | 95.52  | 112.93 | 114.98 | 99.04  | 121.48 | 103.11 |
| Zolpidem         | 98.52  | 96.92  | 93.29  | 112.17 | 103.73 | 113.02 | 110.52 | 100.53 | 105.43 |
| Zopiclone        | 90.00  | 90.83  | 94.90  | 117.01 | 106.61 | 105.87 | 105.30 | 96.83  | 100.47 |
| Ketamine         | 99.61  | 90.80  | 86.10  | 106.61 | 115.71 | 108.04 | 106.19 | 105.06 | 93.03  |
| LSD              | 95.03  | 90.28  | 96.23  | 111.25 | 99.48  | 115.77 | 105.72 | 89.81  | 111.40 |
| Mescaline        | 90.73  | 89.31  | 87.00  | 122.84 | 104.37 | 123.62 | 111.45 | 93.21  | 107.55 |
| Norketamine      | 103.50 | 95.76  | 90.85  | 105.17 | 109.93 | 108.57 | 108.85 | 105.27 | 98.64  |
| O-H-LSD          | 106.83 | 86.62  | 84.27  | 102.42 | 100.64 | 116.33 | 109.41 | 87.18  | 98.04  |
| PCP              | 100.80 | 97.88  | 85.59  | 106.97 | 103.24 | 114.50 | 107.83 | 101.05 | 98.00  |
| Allobarbitol     | 115.90 | 118.26 | 121.38 | 105.12 | 86.23  | 110.72 | 121.84 | 101.98 | 134.38 |
| Amobarbitol      | 82.25  | 95.23  | 97.26  | 123.77 | 103.67 | 102.22 | 101.81 | 98.72  | 99.42  |
| Barbitol         | 125.19 | 121.86 | 126.14 | 103.60 | 79.52  | 107.48 | 129.70 | 96.91  | 135.58 |
| Butalbitol       | 105.48 | 109.25 | 87.77  | 113.87 | 96.92  | 116.96 | 120.11 | 105.89 | 102.66 |
| Hexobarbitol     | 49.43  | 119.86 | 104.88 | 102.45 | 77.57  | 118.09 | 50.64  | 92.97  | 123.85 |
| Pentobarbitol    | 117.26 | 80.07  | 107.60 | 89.28  | 129.94 | 96.42  | 104.69 | 104.04 | 103.75 |
| Phenobarbitol    | 116.25 | 94.49  | 105.35 | 102.32 | 91.48  | 113.40 | 118.95 | 86.43  | 119.47 |
| Secbutabarbitol  | 113.84 | 112.67 | 98.05  | 99.56  | 96.80  | 113.10 | 113.34 | 109.07 | 110.90 |
| Secobarbitol     | 76.87  | 123.75 | 93.21  | 123.28 | 102.86 | 108.90 | 94.77  | 127.29 | 101.51 |
| Thiopental       | 87.03  | 112.36 | 86.03  | 116.26 | 106.16 | 134.76 | 101.19 | 119.28 | 115.94 |
